# Supplementary material for: Use of haploidentical stem cell transplantation continues to increase: the 2015 European Society for Blood and Marrow Transplant activity survey report
Source: PubMed Central journal article supplement — Bone Marrow Transplant. 2017 Mar 13;52(6):811–7. doi: 10.1038/bmt.2017.34 (PMC5467246; doi:10.1038/bmt.2017.34), 2017-03-13
Supplement: bmt201734x1.pdf [file bmt201734x1.pdf]

## EBMT Transplant Activity Survey 2015

### APPENDIX

#### List of participating transplant centers in 2015

(Total 1st HSCT (total all HSCT) N allogeneic 1st HSCT / N autologous 1st HSCT)

##### **Algeria:** (2 teams: 267 (276 154/113))

Alger, Centre Pierre et Marie Curie, ads, peds, CIC 703, R. Hamladji (188 (197) 134/54)  
Oran, University Hospital of Oran, ads, peds, CIC 993, M. Bekadja (79 (79) 20/59)

##### **Austria:** (12 teams: 459 (535) 184/275)

Graz, University of Graz, ads, CIC 308, H. Greinix, H. Sill (64 (73) 28/36)  
Graz, Universitäts Kinderklinik, peds, CIC 593, Ch. Urban (11 (12) 7/4)  
Innsbruck, University Hospital, ads, peds, CIC 271, G. Gastl, D. Nachbaur (61 (71) 31/30)  
Klagenfurt, Klinikum Klagenfurt, ads, W. Eisterer (11 (11) 0/11)  
Linz, AO Krankenhaus, ads, M. A. Fridrik, S. Hennerbichler (2 (2) 0/2)  
Linz, AOKH der Elisabethinen, ads, CIC 594, J. Clausen, H. Kasparu (84 (104) 41/43)  
Salzburg, LKA Salzburg, ads, CIC 356, R. Greil, G. Russ (36 (37) 0/36)  
Vienna, Universitätsklinik für Innere Medizin-AKH, ads, CIC 227, H. Greinix, P. Kalhs (95 (108) 55/40)  
Vienna, St. Anna Kinderspital, peds, CIC 528, G. Mann, C. Peters, S. Matthes (31 (35) 22/9)  
Vienna, Hanusch Krankenhaus, ads, CIC 743, E. Koller (29 (40) 0/29)  
Vienna, Donauespital, ads, CIC 767, C. Sebesta, P. Kier (6 (11) 0/6)  
Vienna, Wilhelminenspital, ads, CIC 828, H. Ludwig (29 (31) 0/29)

##### **Azerbaijan:** (1 team: 15 (15) 14/1)

Baku, Republican Thalassemia Centre, ads, CIC 176, N. Aliyeva Rafiq, S. Saila Rauf (15 (15) 14/1)  
Ganja, Ganja International Hospital, ads, CIC 517, S. Dincer (no report)

##### **Republic of Belarus:** (2 teams: 159 (168) 42/117)

Minsk, Belorussian Transplant Centre, Hospital No. 9, ads, N. Milanovich (117 (120) 22/95)  
Minsk, Belorussian Center, peds, CIC 591, O. Aleinikova (42 (48) 20/22)

##### **Belgium:** (19 teams: 819 (896) 382/437)

Antwerp, Stuivenberg ZH, ads, CIC 339, P. Zachee (36 (39) 17/19)  
Antwerp, University Antwerpen, ads, peds, CIC 996, W. Schroyens, Z. Berneman (46 (47) 26/20)  
Brugge, A.Z. St. Jan, ads, peds, CIC 506, D. Selleslag, T. Lodewyck, A. v. Hoof, J. v. Droogenbroeck (80 (87) 33/47)  
Brussels, Institut Jules Bordet, Childrens Hospital, ads, peds, CIC 215, D. Bron, C. Devalck, A. Ferster (58 (74) 34/24)  
Brussels, Clinique Universitaire St. Luc, ads, peds, CIC 234, X. Poiré, C. Vermylen (89 (95) 57/32)  
Brussels, U.L.B. Hôpital Erasme, ads, CIC 596, V. De Wilde (12 (13) 0/12)  
Brussels, University Hospital, ads, peds, CIC 630, R. Schots, F. Trullemans (30 (31) 12/18)  
Charleroi, Hopital Notre Dame, ads, CIC 349, M. Detrait, D. Pranger (12 (13) 0/12)  
Charleroi, CHU Charleroi, ads, CIC 804, A. Triffet (no report)  
Gent, University Hospital, ads, peds, CIC 744, L.A. Noens (78 (79) 49/29)  
Haine St. Paul, Hôpital de Jolimont, ads, CIC 234, N. Straetmans (14 (14) 0/14)  
Hasselt, Jessa Ziekenhuis, ads, CIC 632, K. Theunissen, V. Madeo (30 (34) 0/30)  
Leuven, University Hospital Gasthuisberg, ads, peds, CIC 209, J. Maertens, G. Verhoef, M. Renard (114 (130) 76/38)  
Liège, CHR-Citadelle, ads, CIC 353, J. Bury, C. Jacquy (8 (10) 0/8)  
Liège, University Hospital Sart-Tilman, ads, peds, CIC 726, Y. Béguin, B de Prijck (85 (93) 43/42)  
Mons, Hopital Ambroise Pare, ads, CIC 709, V. Robin (5 (6) 0/5)  
Roeselare, H. Hart Ziekenhuis, ads, CIC 646, H. Demuynck, F. Van Aelst, J. Tytgat, J. Demol (32 (35) 15/17)  
Turnhout, AZ Turnhout, ads, CIC 910, G. Bries, I. Vrelust (10 (10) 0/10)  
Wilrijk-Antwerp, Sint Agustinos GVA, ads, CIC 715, J. Lemmens (27 (29) 0/27)  
Yvoir, Clinique universitaire de Mont-Godinne, ads, CIC 234, C. Doyen (53 (57) 20/33)

##### **Bosnia-Herzegovina:** (2 teams: 24 (24) 2/22)

Sarajevo, Clinical Centre, ads, CIC 198, A. Sofo-Hafizovic (11 (11) 0/11)  
Tuzla, University Clinical Centre, ads, A. Kopic (13 (13) 2/11)

**Bulgaria:** (2 teams: 92 (97) 12/80)

Sofia, Ped. Hospital for Oncohematology and BMT, peds, CIC 346, D. Konstantinov, D. Bobev, B. Avramova (8 (9) 1/7)

Sofia, National Centre of Hematology, ads, CIC 859, Y. Petrov (84 (88) 11/73)

**Croatia:** (3 teams: 186 (212) 75/111)

Zagreb, Hospital Merkur, ads, CIC 159, D. Radic-Kristo, B. Jaksic (37 (50) 0/37)

Zagreb, University Hospital Rebro, ads, peds, CIC 302, D. Nemet, R. Serventi-Seiwerth (126 (133) 75/51)

Zagreb, University Hospital Dubrava, ads, CIC 407, V. Pejisa, O. Jaksic (23 (29) 0/23)

**Cyprus:** (1 team: 18 (18) 0/18)

Nicosia, Nicosia General Hospital, ads, CIC 575, K. Melanthiou, C. Stylianou (18 (18) 0/18)

**Czech Republic:** (9 teams: 596 (711) 248/348)

Brno, Masaryk University Hospital, ads, peds, CIC 597, J. Mayer, Z. Koristek (92 (129) 30/62)

Hradec Kralové, Charles University, ads, CIC 729, L. Jebavy, Pr. Maly, S. Filip, M. Blaha (76 (90) 36/40)

Olomouc, University Hospital, ads, CIC 574, E. Faber (67 (67) 33/34)

Ostrava, University Hospital Ostrava, ads, CIC 156, R. Hajek (45 (48) 0/45)

Pilsen, Charles Hospital, ads, CIC 718, P. Jindra, A. Jungova (95 (116) 41/54)

Prague, Charles University Vinohrady, ads, CIC 318, T. Kozak (31 (33) 0/31)

Prague, University Hospital Motol, peds, CIC 452, P. Sedlacek (44 (61) 34/10)

Prague, Charles University, ads, CIC 745, M. Trneny (72 (89) 0/72)

Prague, Institute of Hematology and Blood Transfusion, ads, CIC 656:1, A. Vitek, P. Kobylka (74 (78) 74/0)

**Denmark:** (4 teams: 267 (293) 142/125)

Aalborg, Aalborg Hospital, ads, CIC 848, I. Christiansen, J. Baech, K. Nielsen (33 (40) 0/33)

Aarhus, Amtssygehus, ads, peds, CIC 634, E. Segel, Dr. Moeller (92 (102) 34/58)

Copenhagen, Rigshospitalet, ads, peds, CIC 206, H. Sengelov (108 (117) 108/0)

Copenhagen, Herlev Hospital, ads, CIC 568, P. Andersen, P. Josefsson (34 (34) 0/34)

**Estonia:** (2 teams: 56 (62) 21/35)

Tallinn, North Estonia Medical Centre, ads, CIC 984, K. Palk (29 (32) 0/29)

Tartu, University Hospital, ads, peds, CIC 746, H. Everaus, A. Kaare (27 (30) 21/6)

**Finland:** (7 teams: 380 (408) 156/221)

Helsinki, Children's Hospital, peds, CIC 219, K. Vettenranta (24 (26) 20/4)

Helsinki, Helsinki University Central Hospital, ads, peds, CIC 515, L. Volin (123 (124) 93/30)

Helsinki, Oncology, University Hospital, ads, CIC 833, H. Joensuu, R. Janes (17 (17) 0/17)

Kuopio, University Hospital, ads, peds, CIC 396, E. Jantunen, T. Nousiainen (51 (54) 0/51)

Oys Oulu, Oulu University Central Hospital, ads, CIC 690, M. Säily (46 (49) 0/46)

Tampere, University Hospital, ads, peds, CIC 635, M. Sankelo, M. Sinisalo (36 (45) 0/36)

Turku, University Central Hospital, ads, peds, CIC 225, M. Itälä-Remes, K. Remes (83 (93) 46/37)

**France:** (74 teams : 4'565 (5'026) 1'816/2'749 )

Amiens, CHU d'Amiens, ads, CIC 955, G. Damaj, L. Breton (99 (106) 49/50)

Angers, Centre Hospitalier, ads, peds, CIC 650, N. Ifrah, S. Francois, P. Guardiola (90 (91) 46/44)

Argenteuil, Hopital Victordupouy, ads, CIC 199, L. Sutton, P. Genet (18 (20) 0/18)

Bayonne, C.H. De la Cote Basque, ads, A. Banos (27 (31) 0/27)

Besancon, Hopital Jean Minjoz and St.Jacques, ads, peds, CIC 233, P. Herve, E. Deconinck, P. Rohrllich (75 (80) 46/29)

Bordeaux, CHU Hopitalier Pellegrin- Enfants, peds, CIC 978, C. Jubert, Y. Perel (27 (30) 21/6)

Boulogne sur Mer, CHU Hopital Duchenne, ads, B. Choufi, Dr. Voronina (20 (20) 0/20)

Brest, Hopital Morvan, CHU de Brest, ads, S. Creachcadec (56 (69) 24/32)

Caen, Institut d'hématologie de Basse-Normandie, CHU Caen, ads, CIC 251, G. Damaj, O. Reman, J-P. Vilque (92 (106) 32/60)

Clamart, Hopital d'Instruction des Armées Percy, ads, JV. Malfuson, G. Nedellec (47 (53) 15/32)

Clermont Ferrand, CRCTCP, CHU Estaing, ads, peds, CIC 273, J.-O. Bay, F. Deméocq, P. Travade (81 (90) 30/51)

Colmar, Hopital Civils, ads, C. Precupann (10 (10) 0/10)

Corbeil Essonne, Hopital Gilles de Corbeil, ads, A. Devidas (23 (24) 0/23)

Créteil, Hopital H. Mondor, ads, CIC 252, C. Cordonnier, M. Kuentz (34 (38) 33/1)

Créteil, Hopital Henri Mondor, ads, CIC 432, C. Haioun (49 (50) 0/49)

Dijon, Hopital des Enfants, ads, D. Caillot (84 (105) 0/84)

Dunkerque, Centre Hospitalier, ads, M. Wetterwald (20 (20) 0/20)

Grenoble, CHV Grenoble, ads, peds, CIC 270, J.Y. Cahn, P. Drillat, C.E. Bulabois (98 (106) 40/58)

Le Chesnay, C.H. De Versailles, ads, S. Castaigne, Ph. Rousselot (26 (26) 0/26)

Lens, Service d'Hématologie, ads, L. Stalnikiewicz (no report)

Lille, Centre Hospitalier Saint Vincent, ads, N. Cambier (17 (17) 0/17)

Lille, Centre Oscar Lambret, peds, A. Defachelles (10 (11) 0/10)

Lille, Hopital Claude Huriez, ads, peds, CIC 277, F. Bauters, J.P. Jouet (130 (138) 91/39)

Lille, Hopital Jeanne de Flandre, peds, CIC 963, B. Bruno (15 (15) 14/1)

Limoges, CHU Dupuytren, ads, peds, CIC 977, D. Bordessoule, P. Turlure (57(62) 27/30)

Lyon, Centre Léon Bérard, ads, CIC 241, P. Biron, T. Philip (76 (79) 0/76)

Lyon, Hopital Edouard Herriot, ads, CIC 671, M. Michallet (76 (86) 74/2)

Lyon, Institut d'Hématologie et d'Oncologie Pédiatrique, peds, CIC 806, Y. Bertrand (34 (34) 28/6)

Marseille, Institute Paoli I. Calmettes, ads, CIC 230, D. Blaise, Chabannon C. (272 (309) 113/159)

Marseille, Hopital Timone Enfants, peds, CIC 301, G. Michel, C. Coze (34 (38) 26/8)

Marseille Bouches du Rhone, Centre Hospitalier Universitaire La Conception, ads, CIC 158, R. Costello (27 (28) 0/27)\*

Meaux, Centre Hospitalier de Meaux, ads, CIC 194, J. Frayfer (12 (13) 0/12)

Metz, CHR de Metz-Thionville, ads, V. Morel-Dorvaux (39 (39) 0/39)

Montpellier, CHR Lapeyronie, ads, peds, CIC 926, JF. Rossi, N. Fegueux, G. Margueritte (202 (209) 87/115)

Mulhouse, Hopital du Hasenrain, ads, CIC 944, B. Drénou, M. Ojeda-Urbe (19 (21) 0/19)

Nantes, Hotel Dieu, CHU Nantes, ads, peds, CIC 253, P. Chevallier (241 (278) 111/130)

Nice, Centre Antoine Lacassagne, ads, A. Thyss (56 (58) 0/56)

Nice, Hopital de l'Archet 1, ads, peds, CIC 523, J.P. Cassuto, N. Gratecos (74 (78) 50/24)

Orleans, CHR Orléans, Hôpital de la Source, ads, CIC 164, M. Alexis (21 (26) 0/21)

Paris, Hôpital Cochin, ads, M. Quarre (47 (57) 0/47)

Paris, Hôpital d'enfants Armand Trousseau, peds, G. Leverger, L. Douay, A. Auvrignon (1 (1) 0/1)

Paris, Immuno-Hématologie, Hôpital St. Louis, ads, J.P. Fernand, B. Anrulf (no report)

Paris, Hôpital Necker, ads, CIC 160, O. Hermine, F. Suarez (84 (87) 46/38)

Paris, Hôpital Necker des enfants malades, peds, CIC 201, A. Fischer (46 (59) 44/2)

Paris, Hôpital St. Louis, ads, peds, CIC 207, G. Socié, E. Gluckman, H. Esperou (126 (129) 118/8)

Paris, Hôpital Pitié Salpêtrière, ads, CIC 262, JP. Vernant, V. Leblond, N. Dedhin (104 (122) 59/45)

Paris, Hôpital Robert Debré, peds, CIC 631, JH. Dalle (54 (57) 54/0)

Paris, Institut Curie, ads, peds, CIC 702, J. Michon, Ph. Brault (36 (44) 0/36)

Paris, Hôpital Tenon, ads, CIC 747, J.P. Lotz (18 (33) 0/18)

Paris, Hôpital St. Antoine, ads, CIC 775, M. Mohty, F. Giannotti, C. Gorin (163 (165) 70/93)

Paris, Hôpital St. Louis, ads, CIC 805, C. Thieblemont (33 (33) 0/33)

Paris, Hôpital St. Louis, ads, CIC 960, H. Dombret, L. Degos, P. Rousselot (0 (0) 0/0)

Pessac, Hôpital du Haut Leveque, CHU Bordeaux, ads, CIC 267, N. Milpied, G. Marit, R. Tabrizi (188 (212) 80/108)

Pierre Benite, Centre Hospitalier Lyon-Sud, ads, CIC 901, G. Salles (77 (82) 0/77)

Poitiers, CHU de Poitiers, Hôpital La Miletrie, ads, peds, CIC 264, M. Maillard, F. Guilhot (66 (66) 24/42)

Pontoise, Hôpital René Dubos, ads, CIC 961, H. Gonzalez (23 (23) 0/23)

Reims, Hôpital Robert Debré, ads, CIC 959, C. Himberlin (50 (51) 0/50)

Rennes, Hôpital Pontchaillou, ads, CIC 6611, T. Lamy, M Bernard (132 (149) 38/94)

Rennes, Clinique Médical Infantile, CHRU, peds, CIC 6612, V. Gandemer (19 (21) 14/5)

Roubaix, Hopital V. Provo, ads, I. Plantier-Colcher (13 (15) 0/13)

Rouen, Hôpital Charles Nicolle, peds, JP. Vannier (12 (16) 6/6)

Rouen, Centre Henri Becquerel, ads, CIC 941, H. Tilly (99 (102) 25/74)

Saint Denis De La Réunion, CHD Felix Guyon, ads, Ph. Agape (15 (15) 0/15)

Saint Pierre Le Tampon, Centre Hospitalier General, ads, P Zunic, E. Perez (no report)



Saint Priest en Jarez, 'Institu de Cancérologie Lucien Neuwirth, ads, CIC 250, D. Guyotat, J. Cornillon (60 (64) 26/34)  
 Saint Quentin, Cent. Hospit. De Saint Quentin, ads, CIC 406, R. Garidi (8 (12) 0/8)  
 St. Cloud, Institut Curie, Hopital René Huguenin, ads, S. Glaisner (32 (34) 0/32)  
 Strasbourg, Hôpital de HautePierre, peds, P. Lutz (22 (24) 19/3)  
 Strasbourg, Hôpital de HautePierre, ads, CIC 672, B. Lioure, P. Lutz (110 (119) 46/64)  
 Toulouse, Hôpital de Purpan, ads, CIC 624, M. Attal (162 (177) 62/100)  
 Toulouse, Hôpital Purpan, peds, CIC 952, H. Rubie (8 (10) 0/8)  
 Tours, Hôpital Bretonneau, ads, peds, CIC 272, E. Gyan, M. Renaud (72 (87) 7/65)  
 Valenciennes, Centre Hosp. de Valenciennes, ads, M. Simon (no report)  
 Vandoeuvre-les-Nancy, CHU de Brabois, ads, C. Scellier, Pr. Feugier, C. Bonmati (53 (56) 0/53)  
 Vandoeuvre-les-Nancy, Hôpital d'Enfants, ads, peds, CIC 676, L. Clement (51 (53) 44/7)  
 Villejuif, Hôpital Paul Brousse, ads, B. Delmas-Marsalet (2 (4) 0/2)  
 Villejuif, Institut G. Roussy, peds, CIC 503, D. Valteau-Couanet (23 (36) 0/23)  
 Villejuif, Gustave Roussy Cancer Campus, ads, CIC 666, J-H. Bourhis, C. Castilla-Llorente (168 (197) 77/91)

**Germany:** (111 teams: 6'466 (7'716) 3'052/3'414)

Aachen, Universitätsklinikum, ads, CIC 348, T.Brümmendorf, E. Jost (55 (68) 29/26)  
 Augsburg, Klinikum Augsburg, ads, CIC 152, G. Schlimok, C. Schmidt (71 (82) 27/44)  
 Bayreuth, Klinikum Bayreuth, ads, A. Kiani, C. Pfeiffer (14 (14) 0/14)  
 Berg, Schön Klinik Starnberger See, ads, C. Straka (41 (87) 0/41)  
 Berlin, Vivantes Klinikum Neukoellen, ads, M de Wit, L. Marretta (30 (40) 0/30)  
 Berlin, Charité, Campus Virchow Klinikum, peds, CIC 336, W. Ebell (42 (48) 36/6)  
 Berlin, HELIOS Klinikum Berlin Buch, ads, CIC 518, W. Ludwig, D. Schöndube, T. Held (69 (90) 16/53)  
 Berlin, Charité, Campus Benjamin Franklin, ads, CIC 590, E. Thiel, L. Uharek (52 (74) 0/52)  
 Berlin, Charite Campus Virchow Klinikum, ads, CIC 807, B. Dörken, R. Arnold (193 (216) 143/50)  
 Bielefeld, Krankenanstalten Gilead, ads, F. Weissinger (20 (29) 0/20)  
 Bielefeld, Klinikum Bielefeld, ads, CIC 949, M. Görner (15 (15) 0/15)  
 Bochum, Knappschafts Krankenhaus, ads, CIC 124, W. Schmiegel, R. Schroers (94 (109) 20/74)  
 Bonn, Universitätsklinikum, peds, D. Dilloo (12 (15) 9/3)  
 Bonn, Universitätsklinikum, ads, CIC 134, P. Bossart, M. von Lilienfeld-Toal (77 (90) 41/36)  
 Braunschweig, Städtisches Klinikum, ads, CIC 674, F. Lordick, G. Fritsch (48 (54) 0/48)  
 Bremen, Evangelistisch Diakonie-Krankenhaus GmbH, ads, J. Kullmer, K.H. Pflüger (24 (31) 0/24)  
 Bremen, Klinikum Bremen-Mitte, ads, CIC 602, B. Hertenstein, H. Thomssen (47 (57) 18/29)  
 Chemnitz, Klinikum Chemnitz GmbH, ads, CIC 104, M. Hänel, A. Morgner (58 (74) 5/53)  
 Cottbus, Carl-Thiem-Klinikum, ads, H. Steinhauer, N. Peter (14 (17) 0/14)  
 Dortmund, St. Johannes Hospital, ads, CIC 125, R. Meyer, M. Hindahl (9 (9) 0/9)  
 Dresden, Universitätsklinikum Carl Gustav Carus, ads, peds, CIC 808, G. Ehninger, M. Bornhäuser, M. Gahr (158 (180) 98/60)  
 Duisburg, Helios St. Johannes Klinik, ads, CIC 519, C. Aul, A.M. Asemissen (31 (47) 0/31)  
 Düsseldorf, Universitätsklinikum, ads, CIC 390, R. Hass, G. Kobbe (141 (182) 60/81)  
 Düsseldorf, Universitätsklinikum, peds, CIC 651, A. Borkhardt, R. Meisel, F. Schuster (28 (44) 20/8)  
 Erfurt, Helios-Klinikum, ads, CIC 966, H. Sayer, V. Schmidt (11 (12) 0/11)  
 Erlangen, Universitätsklinikum, ads, CIC 8091, A. Mackensen, W. Rösler, J. Winkler (99 (109) 50/49)  
 Erlangen, Universitäts-Klinik für Kinder und Jugendliche, peds, CIC 8092, W. Rascher, W. Holter, KD. Stächel (13 (15) 10/3)  
 Essen, West German Cancer Center, ads, M. Schuler, S. Bauer (4 (4) 0/4)  
 Essen, Universitätsklinikum, ads, U. Dührsen, R. Noppeney (68 (83) 0/68)  
 Essen, Universitätsklinikum, ads, CIC 259, D.W. Beelen (174 (178) 173/1)  
 Essen, Evangelisches Krankenhaus Essen-Werden GmbH, ads, CIC 784, P. Reimer, M. Wattad (60 (62) 26/34)  
 Essen, Universitätsklinikum, peds, CIC 259:2, B. Kremens, Dr. Basu (16 (20) 14/2)  
 Flensburg, St. Franziskus Hospital, ads, peds, CIC 970, N. Basara, H. Menzel (50 (53) 30/20)  
 Frankfurt, KH Nordwest, ads, E. Weidmann, E. Jäger (1 (1) 0/1)  
 Frankfurt, J. W. Goethe Universität, peds, CIC 138, T. Klingebiel, P. Bader (35 (43) 32/3)  
 Frankfurt, Klinikum Frankfurt Oder, ads, CIC 190, M. Kiehl (26 (32) 17/9)  
 Frankfurt, KH Bethanien, ads, CIC 193, W. Knauf (21 (23) 0/21)  
 Frankfurt, Universitätsklinikum d. J. W. Goethe, ads, CIC 297, H. Martin, H. Serve (120 (151) 58/62)  
 Freiburg, Universitätsklinikum, peds, CIC 810, C. Niemeyer, B. Strahm (32 (34) 30/2)

Freiburg, Universitätsklinikum, ads, CIC 810, J.Duyster, J. Finke, M.Engelhardt (190 (232) 77/113)

Giessen, Universitätsklinikum, peds, CIC 326, A. Reiter, W. Wössmann (21 (22) 12/9)

Göttingen, Universitätsklinikum, ads, CIC 552, L. Trümper, G. Wulf (120 (147) 70/50)

Greifswald, Universitätsklinikum, ads, CIC 530, G. Dölken, W. Krüger (46 (49) 19/27)

Greifswald, Universitätsklinikum, peds, CIC 908, H. Lode, H. Graf von Einsiedel (8 (9) 3/5)

Hagen, St. Marien Hospital, ads, CIC 536, H. W. Lindemann, V. Rethwisch (10 (11) 0/10)

Halle, Universitätsklinikum, ads, CIC 338, H-J. Schmoll, L. Müller, T. Weber (62 (76) 36/26)

Halle, Universitätsklinikum, peds, CIC 654, D. Körholz, C. Mauz-Körholz (1 (2) 0/1)

Hamburg, Asklepios Klinik St. Georg, ads, CIC 153, N. Schmitz, B. Glass, M. Zeis (140 (144) 81/59)

Hamburg, Asklepios Klinik Altona, ads, CIC 366, H. Salwender, D. Braumann (42 (50) 0/42)

Hamburg, Universitätsklinikum Eppendorf, ads, peds, CIC 614, N. Kröger, R. Schneppenheim (211 (231) 186/25)

Hamburg, Universitätsklinikum Eppendorf - Onkologisches Zentrum, ads, CIC 673, C. Bokemeyer (65 (79) 0/65)

Hameln, Sana Klinikum Hameln-Pyrmont, ads, F. Krebbel (2 (2) 0/2)

Hamm, St. Marien Hospital, ads, CIC 147, H. Dürk, H. Pelz (7 (9) 0/7)

Hamm, Evangelistisch Krankenhaus, ads, CIC 509, J. Schubert, E. Lange (21 (26) 0/21)

Hannover, Medizinische Hochschule, ads, CIC 295, A. Ganser, J. Krauter (125 (147) 77/48)

Hannover, Medizinische Hochschule, peds, CIC 295, C. Kratz, KW. Sykora (23 (31) 21/2)

Hannover, Klinikum Region Siloah, ads, CIC 342, H. Kirchner, M. Sosada (23 (26) 0/23)

Heidelberg, Universitätsklinikum, ads, CIC 524, A. D. Ho, P. Dreger (271 (355) 96/175)

Heidelberg, Angelika Lautenschläger-Klinik, peds, CIC 524, A. Kulozik, J. Greil (11 (13) 9/2)

Homburg/Saar, Universität des Saarlandes, ads, CIC 7851, G. Held, M. Pfreudschuh (77 (87) 31/46)

Homburg/Saar, Universität des Saarlandes, peds, CIC 7852, N. Graf, T. Krenn (2 (3) 0/2)

Jena, Universitätsklinikum, ads, CIC 533, A. Hochhaus, H.G. Sayer (83 (97) 48/35)

Jena, FS Universitäts-Kinderklinik, peds, CIC 750, J. Beck, B. Gruhn (9 (12) 8/1)

Kaiserslautern, Westfalzklinikum, ads, CIC 357, H. Link, S. Mahlmann (11 (11) 0/11)

Karlsruhe, Städtische Klinik, ads, CIC 290, M. Bentz, M. Ringhoffer (47 (49) 16/31)

Kassel, Klinikum Kassel, ads, M. Wolf, E. Steinhauer, M. Nathrath (24 (33) 0/24)

Kiel, Universitätsklinikum Schleswig-Holstein, ads, CIC 256, M. Gramatzki, T. Valerius (103 (115) 46/57)

Kiel, Universitätsklinikum Schleswig-Holstein, peds, CIC 256, M. Schrappe, A. Schrauder (12 (16) 8/4)

Koblenz, Stiftungsklinikum Mittelrhein, ads, CIC 879, R. Naumann, D. Niemann (11 (18) 0/11)

Köln, Universitätsklinikum, ads, peds, CIC 534, M. Hallek, Ch. Scheid, F. Berthold, T. Simon (207 (232) 88/119)

Leipzig, Universitätsklinikum, ads, peds, CIC 389, D. Niederwieser (159 (187) 87/72)

Lemgo, Klinikum Lippe, ads, F. Hartmann C. Constantin (14 (25) 0/14)

Lübeck, Sana Klinikum, ads, S. Fetscher, J. Schmielau (15 (15) 0/15)

Lübeck, Universitätsklinikum Schleswig Holstein, ads, CIC 367:1, H. Lehnert, H. Biersack (32 (32) 20/12)

Lübeck, Universitätsklinikum Schleswig Holstein, peds, CIC 367:2, E. Herting, M. Lauten (2 (2) 0/2)

Ludwigshafen, klinikum der Stadt, ads, M. Uppenkamp, M. Hoffmann (7 (9) 0/7)

Magdeburg, Universitätsklinikum, ads, CIC 359, T. Heinicker, T. Fischer (42 (53) 17/25)

Mainz, Universitätsklinikum, ads, CIC 786, M. Theobald, W. Herr (124 (146) 75/49)

Mannheim, Universitätsklinikum, ads, CIC 142, WK. Hofmann, S. Klein (44 (54) 24/20)

Marburg, Universitätsklinikum, ads, CIC 645, A. Neubauer, A. Burchert (87 (108) 44/43)

Minden/Westfalen, Klinikum Minden, ads, CIC 113, H. Tischler, M. Griesshammer (31 (35) 0/31)

Möchengladbach, Klin Maria Hilf II, KH St. Franziska, ads, U. Graeven, A. Lang (9 (9) 0/9)

Munich, Klinikum Schwabing, ads, CM. Wendtner, N. Fischer (49 (54) 24/25)

Munich, Rotkreuz Klinikum, ads, M. Hentrich (29 (43) 0/29)

Munich, KH München Schwabing, peds, CIC 189, S. Burdach, A. Wawer, M. Nathrath (15 (15) 13/2)

Munich, Universitätsklinikum Grosshadern, ads, CIC 513, W. Hiddemann, J. Tischer, C. Rieger (127 (139) 71/56)

Munich, Klinikum Rechts der Isar, ads, CIC 558, C. Peschel, M. Verbeek (104 (130) 47/57)

Munich, SKH München- Harlaching, ads, CIC 664, M. Karthaus, M. Hentrich (3 (4) 0/3)

Munich, Kinderklinikum Universität München Grosshadern, peds, CIC 5132, M. Albert, I. Schmid (25 (29) 22/3)

Münster, Universitätsklinikum Münster, peds, CIC 505, H. Jürgens, K. Ehlert (34 (40) 26/8)

Münster, W.-W Universitätsklinikum, ads, CIC 680, W.E. Berdel, M. Stelljes (226 (258) 141/85)

Nürnberg, Klinikum Nord, ads, CIC 625, M. Wilhelm, K. Schäfer-Eckart (62 (74) 29/33)

Oldenburg, Universitätsklinikum, ads, CIC 749, B. Metzner, CH. Köhne, J. Caspar (87 (109) 22/65)

Osnabrück, Klinikum Osnabrück, ads, CIC 101, O. Koch, R.Peceny (11 (25) 0/11)  
 Potsdam, Klinikum Ernst von Bergmann, ads, CIC 106, G. Maschmeyer, A. Dukat (36 (44) 0/36)  
 Regensburg, Universitätsklinikum, ads, peds, CIC 787, R.Andreesen, S. Corbacioglu (133 (146) 88/45)  
 Rostock, Universitätsklinikum, ads, CIC 585, M. Freund, I. Hilgendorf (57 (83) 27/30)  
 Rotenburg-Wümme, Diakoniekrankenhaus, ads, F.Heits, J.Potratz (4 (9) 0/4)  
 Schwerin, Helios Klinik Schwerin, ads, CIC 447, A. Elmaagacli (22 (25) 1/21)  
 Siegen, St. Marien-Krankenhaus, ads, CIC 135, K. Franke, W. Gassmann (no report)  
 Stuttgart, DiakonissenKH, ads, E. Heidemann, M.Bichler (36 (36) 16/20)  
 Stuttgart, Katharinenhospital, ads, H. Mergenthaler, J. Schleicher, E. Heidermann (48 (52) 0/48)  
 Stuttgart, Robert Bosch Krankenhaus, ads, CIC 145, S. Martin, W. Aulitzky, M.kaufmann (63 (72) 23/40)  
 Stuttgart, Universitätsklinikum, peds, CIC 701, S. Bielack, E. Koscielniak (4 (4) 0/4)  
 Tübingen, Universitätsklinikum, ads, CIC 223, L. Kanz, C.Faul (167 (195) 86/81)  
 Tübingen, Universitätsklinikum, peds, CIC 535, R. Handgretinger, P.Lang (34 (41) 29/5)  
 Ulm, Universitätsklinikum, ads, CIC 204, D. Bunjes, H. Döhner (144 (178) 67/77)  
 Ulm, Kinderklinik Universitätsklinikum, peds, CIC 204, K. Debatin, A.Schulz (27 (36) 27/0)  
 Villingen, Schwarzwald-Baar Klinikum, ads, W.Brugger, F.Köhler (26 (36) 0/26)  
 Wiesbaden, Deutsche Klinik für Diagnostik, ads, CIC 311, R. Schwerdtfeger, M. Schleuning (62 (66) 41/21)  
 Würzburg, Universitätsklinikum, peds, CIC 196, P. Schlegel (19 (22) 12/7)  
 Würzburg, Universitätsklinikum, ads, CIC 712, H.Einsele, G.Stuhler (188 (250) 79/109)

**Greece:** (13 teams: 362 (378) 166/196)

Alexandroupolis, Thrace University Med. School, ads, CIC 681, G. Bourikas (0 (0) 0/0)  
 Athens, Athens Medical Center, ads, A. Pigaditou (3 (3) 0/3)  
 Athens, G. Gennimatas Hospital, ads, A. Galanopoulos, A. Zomahe (6 (6) 0/6)  
 Athens, Alexandra Hospital, University of Athens, ads, CIC 431, E. Papaiakovou (no report)  
 Athens, Laikon General Hospital, ads, CIC 438, J. Meletis, M. Angelopoulou (35 (37) 0/35)  
 Athens, University of Athens, ads, CIC 604, P. Tsirigotis (34 (35) 19/15)  
 Athens, Evangelismos Hospital, ads, CIC 622, N.Harhalakis, D.Karakasis (64 (67) 48/16)  
 Athens, Diagnostic & Therapeutic Center 'Hygeia', ads, CIC 643, G. Karianakis (6 (6) 0/6)  
 Athens, Hellenic Cancer Institute St. Savas, ads, CIC 751, A.Pouli (35 (37) 0/35)  
 Athens, Aghia Sophia Childrens Hospital, peds, CIC 752, S. Graphakos (45 (50) 34/11)  
 Crete, University Hospital, ads, CIC 435, H. Papadaki, C. Kalpadaki (10 (10) 0/10)  
 Heraklion, University Hospital Heraklion, peds, CIC 10788, E. Stiakaki (2 (2) 0/2)  
 Patras, University Medical School Hospital, ads, CIC 281, N.C. Zoumbos, A. Spyridonidis, A. Symeonidis, M.Tiniakou (32 (35) 21/11)  
 Thessaloniki, The George Papanicolaou General Hospital, ads, peds, CIC 561, A. Anagnostopoulos (90 (90) 44/46)

**Hungary:** (5 teams: 328 (338) 112/216)

Budapest, St Istvan & St. Lazlo Hospitals, ads, CIC 556, T. Masszi, P.Remenyi (162 (164) 74/88)  
 Budapest, Szent Laszlo Hospital, peds, CIC 824, G. Kriván, E. Torbvagy, L. Lengyel (44 (46) 32/12)  
 Debrecen, University of Debrecen, ads, CIC 648, A. Kiss (68 (71) 0/68)  
 Miskolc, GYEK, Postgraduate Medical School, peds, CIC 599, R. Simon, A.Kelemen (10 (11) 6/4)  
 Pécs, University of Pécs, ads, CIC 682, A.Szomor (44 (46) 0/44)

**Iceland:** (1 team: 22 (25) 0/22)

Reykjavik, National University Hospital, ads, CIC 605, S. Reykdal (22 (25) 0/22)

**Iran:** (3 teams: 719 (726) 401/318)

Shiraz, Nemazee Hospital, ads, peds, CIC 188, M. Ramzi (138 (145) 68/70)  
 Teheran, Shariati Hospital, ads, peds, CIC 633, A. Ghavamzadeh, M. Jahani (438 (438) 301/137)  
 Teheran, Taleghani General Hospital, ads, CIC 916, M. Mehdizadeh, A. Hajifathali (143 (143) 32/111)  
 Urmia, Urmia Medical Sciences University, ads, CIC 923, D. Maleky (no report)

**Ireland:** (4 teams: 220 (246) 83/137)

Dublin, St.James Hospital, ads, peds, CIC 257, P.J. Hayden, P. Browne (151 (167) 73/78)  
 Dublin, St. Vincent's Hospital, ads, CIC 541, K. Fadalla (14 (14) 0/14)  
 Dublin, Our Lady's Hospital of Sick Children, Crumlin, peds, CIC 774, O. Smith (20 (26) 10/10)  
 Galway, University College Hospital, ads, CIC 408, A. Hayat (35 (39) 0/35)



**Israel:** (9 teams: 703 (761) 352/351)

Haifa, Rambam Medical Center, ads, peds, CIC 345, T. Zuckerman (139 (155) 68/71)  
 Jerusalem, Hadassah University Hospital, ads, peds, CIC 258, R. Or, S. Slavin (102 (107) 57/45)  
 Petach-Tikva, Beilinson Hospital, ads, CIC 409, M. Yeshurun (82 (88) 30/52)  
 Petach-Tikva, Childrens Medical center, peds, CIC 755, J. Stein (33 (43) 21/12)  
 Revohot, Kaplan Hospital, ads, CIC 327, A. Berribi (10 (10) 0/10)  
 Tel Aviv, Tel Aviv Sourasky Medical Center, ads, CIC 161, Ron Ram (89 (91) 33/56)  
 Tel Aviv, Sourasky Medical Centre, peds, CIC 670, M. Bitan, R. Elhasid (13 (16) 8/5)  
 Tel Hashomer, Chaim Sheba Medical Center, peds, CIC 572, A. Toren (45 (52) 31/14)  
 Tel Hashomer, Sheba Medical Center, ads, CIC 754, A. Nagler, A. Shimoni (190 (199) 104/86)

**Italy:** (97 teams: 4'227 (4'951) 1'629/2'598)

Alessandria, S.S. Antonio e Biagio e C. Arrigo, ads, CIC 825, A. Levis, M. Pini, F. Salvi, S. Tamiazzo (43 (49) 23/20)  
 Ancona, Azienda Ospedale Salesi Riuniti, peds, P. Pierani, Dr. Coppa (3 (3) 0/3)  
 Ancona, Ancona University, ads, CIC 788, A. Olivieri, P. Leoni (47 (49) 21/26)  
 Ascoli Piceno, Mazzoni Hospital, ads, CIC 119, P. Galieni (32 (37) 12/20)  
 Avellino, A.O.S. Giuseppe Moscati, ads, CIC 789, N. Cantore, G. Storti (36 (47) 7/29)  
 Aviano, CRO Aviano, ads, CIC 162, M. Michieli, M. Rupolo, M. Mazzucato, F. Lollo (31 (45) 0/31)  
 Bari, Università degli Studi di Bari, ads, CIC 649, G. Specchia, D. Pastore (60 (71) 21/39)  
 Bari, IRCCS Istituto Tumori "Giovanni Paolo II", ads, CIC 934, A. Guarini (15 (17) 0/15)  
 Barletta, Hospital of Barletta, ads, CIC 555, G. Tarantini (0 (0) 0/0)  
 Bergamo, ASST Papa Giovanni XXIII, ads, CIC 658, A. Rambaldi (103 (119) 51/52)  
 Bologna, Istituto Ortopedico Rizzoli, ads, peds, CIC 453, M. Abate (8 (8) 0/8)  
 Bologna, Hospital St. Orsola, ads, CIC 240, G. Bandini, M. Cavo, F. Bonifazi (116 (116) 45/71)  
 Bologna, Policlinico. S. Orsola, peds, CIC 790, A. Pession, G. Paolucci, A. Prete (19 (19) 10/9)  
 Bolzano, Ospedale S. Maurizio, ads, CIC 299, A. Billio, M. Casini, I. Cavattoni (75 (89) 24/51)  
 Brescia, Azienda Spedali Civili, ads, CIC 141, D. Russo (29 (31) 29/0)  
 Brescia, Azienda Spedali Civili, ads, CIC 288, G. Rossi, A. Re, L. Cavalli (90 (117) 0/90)  
 Brescia, Università degli Studi di Brescia, peds, CIC 741, F. Porta (18 (20) 14/4)  
 Brindisi, Perrino Hospital, ads, CIC 920, A. Melpignano (10 (10) 0/10)  
 Busto Arsizio, Ospedale di circolo di Busto Arsizio, ads, CIC 927, M. Bregni (13 (14) 0/13)  
 Cagliari, Ospedale A. Businco, ads, CIC 791, E. Angelucci, D. Baronciani (52 (66) 21/31)  
 Cagliari, Binaghi BMT Centre, ads, CIC 811:1, G. La Nasa (30 (36) 9/21)  
 Cagliari, Ospedale per le Microcitemie, peds, CIC 811:2, M. Orofino (10 (10) 7/3)  
 Catania, Ospedale Ferrarotto, University of Catania, ads, peds, CIC 792, G. Milone, G. Moschetti, L. Lo Nigro (93 (94) 29/64)  
 Civitanove Marche, Ospedale di Civitanova Marche, ads, CIC 419, R. Centurioni (13 (15) 0/13)  
 Cremona, Ospedale Maggiore, ads, CIC 226, F. Lanza, P. Spedini (10 (10) 0/10)  
 Cuneo, Azienda Ospedale "S. Croce e Carle", ads, CIC 606, M. Grasso, N. Mordini (29 (33) 15/14)  
 Ferrara, University of Ferrara, ads, CIC 330, A. Cuneo (21 (28) 0/21)  
 Florence, Policlinico di Careggi, ads, peds, CIC 304, A. Bosi, S. Guidi (108 (124) 44/64)  
 Foggia, Azienda Ospedaliero Universitaria, ads, CIC 414, S. Capalbo (12 (15) 12/0)  
 Genova, Ospedale S. Martino, ads, CIC 217, A. Bacigalupo (113 (121) 86/27)  
 Genova, Istituto Giannina Gaslini, peds, CIC 274, E. Lanino (44 (54) 20/24)  
 Genova, Ospedale San Martino, ads, CIC 987, A.M. Carella (23 (23) 0/23)  
 Latina, Ospedale S. Maria Goretti, ads, CIC 379, E. Ortu la Barbera, E. Zappone (12 (14) 0/12)  
 Lecce, Ospedale Vito Fazzi de Lecce, ads, CIC 868, N. Di Renzo (25 (37) 2/23)  
 Medola, Istituto Scientifico Romagnolo, IRST, ads, CIC 298, P. Fattori, F. Fabbri (42 (68) 0/42)  
 Milan, Ospedale Fatebenefratelli e Oftalmico, ads, CIC 269, M. Brunoventre (3 (4) 0/3)  
 Milan, University of Milan IRCCS, ads, CIC 265, A. Cortelezzi, E. Tagliaferri (39 (48) 10/29)  
 Milan, Ospedale di Niguarda, ads, CIC 294, R. Cairoli, G. Grillo (84 (89) 35/49)  
 Milan, Istituto Europeo di Oncologia, ads, CIC 331, R. Pastano. (34 (34) 11/23)  
 Milan, 1st. Clinico Humanitas, ads, CIC 354, L. Castagna (92 (99) 43/49)  
 Milan, Ist. Nazionale Tumori di Milano, ads, peds, CIC 616, P. Corradini (118 (150) 24/94)  
 Milan, Istituto Scientifico H.S. Raffaele, ads, peds, CIC 813, F. Ciceri, M. Marcatti (117 (132) 78/39)  
 Mirano, Ospedale Civile di Mirano, ads, G. Bertoldo (2 (2) 0/2)  
 Modena, University of Modena, ads, peds, CIC 543, F. Narni, A. Cuoghi, P. Bresciani (47 (55) 14/33)  
 Monza, Ospedale San Gerardo, peds, CIC 279, A. Rovelli (27 (29) 26/1)

Monza, Ospedale S. Gerardo de' Tintori, Uni. Di Milano-Bicocca, ads, CIC 544, E. Pogliani, P. Pioltelli, M. Parma (72 (82) 27/45)

Napels, Cardarelli Hospital, ads, F. Ferrara, S. Palmieri (35 (47) 0/35)

Napels, Hospital Pausilipon, peds, V. Poggi, M. Ripaldi (24 (25) 13/11)

Napels, Frederico II University, ads, CIC 766, G. De Rosa, A. Ristano, F. Pane (35 (36) 14/21)

Napels, National Cancer Institute, ads, CIC 839, G. Marcacci, A. Pinto (52 (73) 0/52)

Novara, Ospedale Maggiore della Carita, ads, CIC 867, G. Gaidano, L. Nassi (18 (33) 0/18)

Nuoro, Ospedale San Francesco, ads, CIC 793, G. Latte, A. Palmas (12 (12) 0/12)\*

Padova, Istituto Oncologia Veneto IOV-IRCCS, ads, D.Marino (7 (7) 0/7)

Padova, Centro Leucemie Infantili, peds, CIC 285, C. Messina, E. Calore, S. Varotto (24 (28) 20/4)

Padova, Padua University Hospital, ads, CIC 853, G. Semenzato (31 (31) 0/31)

Pagani, Hospital A. Tortora, ads, C. Califano (13 (14) 0/13)

Palermo, Ospedale die Bambini, peds, CIC 109, O. Ziino (3 (3) 1/2)

Palermo, ARNAS Civico Di Cristina, ads, CIC 157, G. Cardinale (6 (6) 0/6)

Palermo, Ospedale V. Cervello- USL 60, ads, peds, CIC 392, R. Scimè, A. Cavallaro (57 (66) 25/32)

Palermo, Ospedale 'La Maddalena', ads, peds, CIC 692, M. Musso, F. Porretto, A. Crescinanno (97 (132) 23/74)

Parma, Università degli studi, ads, CIC 245, F.Aversa, M. Mangoni (28 (32) 11/17)

Pavia, IRCCS Policlinico S. Matteo, ads, CIC 286, E.P. Alessandrino (111 (146) 43/68)

Pavia, Policlinico IRCCS St. Matteo, ads, peds, CIC 557, M.Zecca (38 (44) 34/4)\*

Pavia, Fondazione Clinica del Lavoro, S. Maugeri, ads, CIC 771, A. Zambelli, G. Robustelli della Cuna (2 (3) 0/2)

Perugia, Ospedale Santa Maria della Misericordia, ads, peds, CIC 794, A. Velardi, A. Carotti (87 (94) 35/52)

Pesaro, Ospedale San Salvatore, ads, peds, CIC 529, G.Visani (34 (40) 16/18)

Pescara, Ospedale Civile, ads, peds, CIC 248, P. Di Bartolomeo (43 (45) 29/14)

Piacenza, Ospedale Civile, ads, CIC 163, L. Cavanna (38 (43) 13/25)

Pisa, University of Pisa, ads, peds, CIC 795, M. Petrini, E. Benedetti (53 (58) 17/36)

Potenza, San Carlo Hospital, ads, CIC 861, A. Olivieri, M. Cimminiello (21 (23) 5/16)

Ravenna, Ospedale Civile, ads, CIC 306, E. Ruffa (26 (37) 0/26)

Reggio di Calabria, Azienda Ospedale " Riuniti e Morelli", Bianchi- Melacrino, ads, CIC 587, G. Messina (66 (85) 20/46)

Reggio Emilia, Arcispedale S. Maria Nuova, ads, CIC 660, F. Merli, L. Facchini (35 (47) 7/28)

Rimini, Ospedale Infermi Rimini, ads, M. Imola (21 (25) 0/21)

Rionero in Vulture, IRCCS/CROB, ads, CIC 185, P. Musto (10 (12) 0/10)

Rome, Università " La Sapienza", ads, peds, CIC 232, R. Foa., A.P. Iori, S. Capria (73 (89) 26/47)

Rome, Ospedale S. Camillo, ads, peds, CIC 287, L. Pierelli, A. Severino (35 (38) 13/22)

Rome, Università Cattolica, ads, CIC 307, S. Cuore, S. Sica, P. Chiusolo (57 (72) 26/31)

Rome, Policlinico Tor Vergata, peds, CIC 383, J. Gaziev, C. Gallucci (23 (23) 23/0)

Rome, Rome Transplant Network, ads, CIC 756, W. Arcese, P. De Fabritiis (168 (187) 55/113)

Rome, IRRCS Ospedale Bambino Gesù, peds, CIC 796, F. Locatelli (126 (144) 102/24)

Salerno, AOU San Giovanni di Dio e Ruggi D'Aragona, ads, CIC 928, C. Selleri, B. Serio (12 (18) 2/10)

San Giovanni Rotondo, Hospital Casa Sollievo Sofferenza, ads, CIC 526, N. Cascavilla, AM. Carella, M. Greco (70 (84) 31/39)

Sassari, Universita Di Sassari, ads, CIC 870, L. Podda (10 (10) 0/10)

Siena, Ospedale Sclavo, ads, CIC 321, G. Marotta, M. Tozzi (39 (47) 13/26)

Taranto, Institute of Haematologie, Ospedale Nord, ads, CIC 332, P. Mazza, G. Palazzo, B. Amurri (36 (40) 11/25)

Torino, Ospedale Magg. S. G. Battista, ads, CIC 231, B. Bennedetto (127 (156) 54/73)

Torino, University Hospital, ads, peds, CIC 305, F. Fagioli, E.Vassallo, M. Aglietta (82 (98) 51/31)

Torino, Ospedale Ordine Mauriziano Umberto I, ads, CIC 455, G. Saglio, A. Cignetti (3 (6) 0/3)

Treviso, Presidio Ospedaliero Treviso, ads, CIC 415, F. Gherlinzoni (33 (41) 0/33)

Tricase (Lecce), Hospital C. Panico, ads, CIC 652, V. Pavone (46 (46) 15/31)

Trieste, Istituto per l'Infanzia, peds, CIC 525, M. Rabusin (10 (13) 7/3)

Udine, Policlinico Universitario & General Hospital, ads, CIC 705, A. Sperotto, R. Fanin (86 (97) 46/40)

Varese, Ospedale di Circolo e Fondazione Macchi, ads, CIC 878, C. Chini (no report)

Venice, Ospedale dell'Angelo, ads, CIC 502, R. Bassan, M. Vespignani (38 (42) 10/28)

Vercelli, S. Andrea Hospital, ads, CIC 863, A. Santagostino (0 (0) 0/0)

Verona, Policlinico G. B. Rossi, ads, peds, CIC 623, F. Benedetti (71 (76) 36/35)

Vicenza, Ospedale S. Bortolo, ads, CIC 797, R. Raimondi, F. Rodeghiero (43 (48) 19/24)



**Jordan:** (2 teams: 120 (126) 70/50)

Amman, Al Khalidi Medical Center, ads, peds, CIC 439, M. Sarhan (14 (15) 9/5)

Amman, King Hussein Cancer Centre, ads, peds, CIC 580, F. Abdelrahman, A. Ahmed Hussein (106 (111) 61/45)\*

**Kazakhstan:** (1 team: 38 (40) 28/10)

Astana, National Research Center for Oncology and Transplantology, ads, I. Pivovarova (38 (40) 28/10)

**Latvia:** (1 team: 18 (18) 1/17)

Riga, Clinic Linezers, ads, CIC 583, S. Lejiniece, I. Trociukas (18 (18) 1/17)

**Lebanon:** (1 team: 92 (102) 37/55)

Beirut, American University of Beirut, ads, peds, CIC 369, A. Bazarbachi (92 (102) 37/55)

**Lithuania:** (2 teams: 168 (197) 65/103)

Vilnius, University Childrens Hospital, peds, CIC 508, J. Rascon (20 (21) 11/9)

Vilnius, Santariskiu Klinikos, ads, CIC 644, L. Griskevicius, I. Trociukas (148 (176) 54/94)

**Luxemburg:** (1 team: 25 (26) 0/25)

Luxemburg, Center Hospitalier, ads, S. De Wilde (25 (26) 0/25)

**Macedonia:** (1 team: 31 (31) 7/24)

Skopje, Medical Faculty, ads, CIC 381, B. Georgievski (31 (31) 7/24)

**Netherlands:** (15 teams: 1'296 (1'419) 516/780)

Amsterdam, Academic Med Centre, ads, peds, CIC 247, M.J. Kersten, J. Zsiros, C.Huisman (83 (86) 31/52)

Amsterdam, VU University Medical Center, ads, peds, CIC 588, E. Meijer, G.J. Ossenkoppele (172 (184) 78/94)

Amsterdam, Antoni Van Leeuwenhoek Cancer Institute, ads, CIC 976, S. Rodenhuis, J. Baars (25 (44) 0/25)

Enschede, Medisch Spectrum Twente, ads, CIC 360, M.R. Schaafsma (34 (34) 0/34)

Groningen, University Hospital, ads, CIC 546, M.R. De Groot (117 (139) 48/69)

Leiden, University Hospital, ads, peds, CIC 203, J.H. Veelken, M Egeler (130 (141) 95/35)

Maastricht, University Hospital, ads, CIC 565, H.C. Schouten, J. Wagstaff (118 (122) 34/84)

Nieuwegein, St. Antonius Hospital, ads, CIC 200, H.K. Koene, O. de Weerd (34 (36) 0/34)

Nijmegen, University Hospital, ads, CIC 237, N. Schapp (127 (134) 52/75)

Rotterdam, Dr. Daniel den Hoed Cancer Center, ads, CIC 246, J.J. Cornelissen, (212 (225) 82/130)

The Hague, Haga Hospital, ads, CIC 547, S. Kersting (55 (62) 0/55)

Utrecht, University Hospital UMCU, ads, CIC 239, E. Petersen (114 (134) 58/56)

Utrecht, Princess Maxima Centre for Ped Oncology, peds, CIC 352, P. Hoogerbrugge (14 (14) 0/14)

Utrecht, UMCU/WKZ, peds, CIC 2392, M. Bierings, NM. Wullffraat (38 (41) 38/0)

Zwolle, Sophia Ziekenhuis, ads, CIC 548, M. van Marwijk Kooy (23 (23) 0/23)

**Nigeria:** (1 team: 0 (0) 0/0)

Benin, University Hospital Benin City, CIC 907, N. Bazuaye (0 (0) 0/0)

**Norway:** (4 teams: 275 (298) 105/170)

Bergen, Haukelands Sjukhus, ads, CIC 197, A. Ahmed (no report)

Oslo, Rikshospitalet-Radiumhospitalet, ads, peds, G. Lauritzen, S. Kvaloy (53 (54) 0/53)

Oslo, Oslo University Hospital, ads, peds, CIC 235, T. Gedde-Dahl (172 (188) 105/67)

Tromso, University Hospital North Norway, ads, A. Vik, G. Knutsen (12 (14) 0/12)

Trondheim, St. Olavs Hospital, ads, J. Hammerstrom, A. Waage (38 (42) 0/38)

**Poland:** (18 teams: 1'398 (1'558) 543/855)

Bydgoszcz, Nicolaus Copernicus University, peds, CIC 764, M. Wysocki, J. Styczynski, R. Debski (20 (26) 16/4)

Cracow, University Children's Hospital JUMC, peds, CIC 507, J. Gozdzik (18 (21) 14/4)

Cracow, CMUJ, ads, CIC 553, A. Skotnicki (70 (70) 43/27)

Gdansk, Medical University, ads, CIC 799, A. Hellmann (80 (81) 31/49)  
 Gliwice, Maria Curie Memorial Cancer centre, ads, CIC 428, S. Giebel (no report)  
 Katowice, Silesian Medical Academy, ads, CIC 677, S. Kyrzcz-Krzemien (222 (236) 98/124)  
 Lodz, Med. University of Lodz, ads, CIC 171, T. Robak (57 (64) 2/55)  
 Lublin, Childrens University Hospital, peds, CIC 678, J. Kowalczyk (16 (17) 13/3)  
 Lublin, University Medical School, ads, CIC 695, M. Wach, A. Walter, W. Legiec (65 (72) 9/56)  
 Poznan, Institute of Pediatrics, peds, CIC 641, J. Wachowiak (22 (28) 16/6)  
 Poznan, Medical Academy, ads, CIC 730, M. Komarnicki, L. Gil, A. Czyz (117 (125) 56/61)  
 Warsaw Institute of Hematology and Transfusion Medicine, ads, CIC 693,  
 K.Halaburda, B.Nasilowska, A.Tomaszewska, A.Szczepinski (78 (94) 41/37)  
 Warsaw, Marie Curie Institute, ads, CIC 800, J. Walewski (73 (77) 0/73)  
 Warsaw, Central Hospital Military Medical Academy, ads, CIC 816, P. Rzepecki, K. Sulek, C. Szczylik  
 (51 (62) 4/47)  
 Warsaw, Central Clinical Hospital, ads, CIC 954, W. Wiktor-Jedrzejczak, A. Dzwigala, M. Rokicka (56  
 (76) 26/30)  
 Wroclaw, Lower Silesian Center / BM Donor Registry, ads, CIC 538, A. Lange (44 (47) 22/22)  
 Wroclaw, Medical Academy, ads, CIC 699, K. Kuliczkowski, J. Dybko (106 (113) 26/80)  
 Wroclaw, University of Medicine, peds, CIC 817, A. Chybicka, J. Owoc-Lempach (72 (79) 52/20)

**Portugal:** (6 teams: 462 (543) 141/321)

Coimbra, University Hospital, ads, CIC 905, C.Geraldes, A. Do Cén Teixeira, L. Ribeiro (39 (43) 0/39)  
 Lisbon, Instituto Portugues de Oncologia, ads, peds, CIC 300, M. Abecasis (90 (101) 46/44)  
 Lisbon, Hospital de Santa Maria, ads, CIC 636, J. Alves do Carmo, F. Forjaz de Lacerda (74 (87) 24/50)  
 Lisbon, Hospital St. Antonio dos Capuchos, ads, CIC 826, A. Botelho de Sousa (55 (71) 0/55)  
 Porto, Instituto Portugues de Oncologia, ads, peds, CIC 291, A. Campos (143 (171) 71/72)  
 Porto, Hospital St. Joao, ads, CIC 329, J. E. Guimaraes (61 (70) 0/61)

**Romania:** (4 teams: 213 (226) 62/151)

Bucharest, Fundeni Clinical Institute, ads, peds, CIC 427, A. Tanase (121 (129) 51/70)  
 Bucharest, Coltea Clinical Hospital, ads, CIC 912, A. Colita, A. Lupu, C. Chimici (17 (17) 0/17)  
 Targu-Mures, Sectia Clinica de Hematologie si, ads, CIC 178, I. Benedek (44 (46) 3/41)  
 Timisoara, Childrens Hospital Louis Turcanu, ads, peds, CIC 174, M. Serban, C. Jinca (31 (34) 8/23)

**Russia:** (11 teams: 1'042 (1'173) 499/543)

Ekaterinburg, Regional Hospital No. 1, ads, peds, T.S. Konstantinova, V.A. Shalaev (31 (31) 14/17)  
 Moscow, Burnasyan Fed. Med. Biophysical Centre, ads, A. Davtyan, A.E. Baranov (22 (31) 0/22)  
 Moscow, Cancer Research Center, ads, K.N. Melkova (19 (22) 4/15)  
 Moscow, Cancer Research Centre, peds, G. Mentkevich (37 (62) 5/32)  
 Moscow, Main Military Clinical Hospital, ads, S.V. Shamansky, O.A. Rukavitsyn (no report)  
 Moscow, National Pirogov Medical Centre, ads, A. Novik, V. Melnichenko, A.Fedorenko (no report)  
 Moscow, The Russian Children's Research Hospital, peds, CIC 411, E. Skorobogatova (76 (76) 56/20)  
 Moscow, Federal Research Center for Pediatric Hematology, peds, CIC 694, A. Maschan, D. Balachov  
 (158 (181) 125/33)  
 Moscow, Research Haematology Center of RAS, ads, CIC 930, V.G. Savtchenko (182 (206) 53/129)  
 Novosibirsk, Institute of Clinical Immunolgy, ads, V. Sergeevuicheva (36 (38) 2/34)  
 Samara, Samara Kalinin Regional Hospital, ads, V.A. Rossiev (no report)  
 St. Petersburg, First State Pavlov Medical University, ads, peds, CIC 725, B.V. Afanasyev, L.  
 Zubarovskaya (309 (351) 211/98)  
 St. Petersburg, Research Institute of Haematology, ads, K.M. Abdulkadirov (no report)  
 St. Petersburg, Research Institute of Oncology na N.N. Petrov, ads, CIC 845, S. Alekseev, I. Zyuzgin (72  
 (75) 0/72)  
 St. Petersburg, Federal Centre V.A. Almazov, ads, CIC 925, A. Zaritskey, D. Motorin (100 (100) 29/71)

**Saudi Arabia:** (5 teams: 445 (467) 296/149)

Dammam, King Fahad Specialist Hospital, ads, peds, CIC 441, H. Al-Hashmi (46 (49) 11/35)  
 Jeddah, King Faisal Hospital, ads, peds, CIC 858, M. Kelta (50 (52) 33/17)  
 Riyadh, King Faisal Specialist Hospital, ads, peds, CIC 397:1, M. Al Jurf (138 (151) 83/55)  
 Riyadh, King Abdul Aziz Medical City, ads, peds, CIC 444, A. Al Askar (79 (82) 46/33)  
 Riyadh, King Faisal Specialist Hospital, peds, CIC 397:2, M. Ayas (132 (133) 123/9)

**Serbia:** (4 teams: 127 (132) 39/88)

Belgrade, Mother and Child Health Institute, peds, CIC 358, D. Vujic (18 (20) 10/8)  
 Belgrade, Clinical Center of Serbia, ads, CIC 373, M. Todorovic (25 (25) 0/25)  
 Belgrade, Military Medical Academy, ads, CIC 582, D. Stamatovic, S. Obradovic (78 (81) 27/51)  
 Novi Sad, Institute for Internal Diseases, ads, CIC 655, A. Savic (6 (6) 2/4)

**Slovakia:** (5 teams: 201 (223) 73/128)

Banská Bystrica, Roosevelt Hospital, ads, CIC 333, I. Markuljak, E. Kralikova (12 (14) 0/12)  
 Bratislava, National Cancer Institute, ads, CIC 368, A. Vranovsky (70 (70) 7/63)  
 Bratislava, University Hospital, ads, CIC 610, M. Mistrík (68 (87) 49/19)  
 Bratislava, University Hospital, peds, CIC 684, S. Sufliarska, J. Horáková, I. Bodova (21 (22) 17/4)  
 Kosice, University Hospital, ads, N. Stecova (30 (30) 0/30)

**Slovenia:** (1 team: 102 (126) 39/63)

Ljubljana, University Medical Centre, ads, peds, CIC 640, S. Zver, J. Pretnar (102 (126) 39/63)

**South Africa:** (5 teams) (226 (229) 98/128)

Cape Town, Groot Schuur Hospital, ads, CIC 512, N. Novitzky, C. Du Toit (33 (33) 14/19)  
 Cape Town, UCT Private Academic Hospital, ads, peds, CIC 512, N. Novitzky (36 (36) 12/24)  
 Cape Town, Constantiaberg Medical Clinic, ads, CIC 772, M. Du Toit (36 (36) 9/27)  
 Durban, Capital Haematology Hospital, ads, J.P. Singh (no report)  
 Durban, Inkosi Albert Luthuli Hospital, ads, J. Singh (no report)  
 Johannesburg, Flora Private Clinic, ads, D. Brittain, K. Gunther (14 (14) 0/14)  
 Johannesburg, Donald Gordon Medical centre, ads, P. Ruff, D. Moodley (no report)  
 Pretoria, East Hospital, ads, peds, CIC 456, J. Thomson, D. Brittain, A. McDonald (107 (110) 63/44)

**Spain:** (71 teams: 2'770 (2'966) 1'069/1'701)

Alicante, Hospital General, ads, P. Fernandez Albellan (32 (32) 0/32)  
 Barakaldo Vizcaya, Hospital de Cruces, ads, CIC 393, J. Garcia-Ruiz, I. Zuazua Verde (65 (69) 0/65)  
 Barcelona, Hospital Mutua de Terrassa, ads, J. M. Martí Tutusaus (15 (18) 0/15)  
 Barcelona, Hospital Clinic, ads, peds, CIC 214, M. Rovira (104 (108) 54/50)  
 Barcelona, Santa Creu i San Pau, peds, CIC 260, I. Badell Serra, N. Pardo (20 (23) 20/0)  
 Barcelona, Santa Creu i Sant Pau, ads, CIC 260, J. Sierra, S. Brunet (102 (113) 46/56)  
 Barcelona, Hospital M. Infantil, Vall d'Hebron, peds, CIC 422, J. Sanchez de Toledo Codina, C. Diaz de Heredia, (37 (42) 32/5)  
 Barcelona, Hospital General Vall d'Hebron, ads, CIC 584, D. Valcarcal (47 (57) 28/19)  
 Barcelona, Hospital Germans Trias i Pujol, ads, peds, CIC 613, J. Ribera (46 (46) 26/20)  
 Barcelona, Hospital Sant Joan de Deu, peds, CIC 668, I. Badell-Serra (5 (11) 0/5)  
 Barcelona, Institute Catala d'Oncologia, Hosp. Duran i Reynals, ads, CIC 759, R. Duarte Palomino (71 (71) 31/40)  
 Caceres, Hospital San Pedro de Alcantara, ads, J. Prieto, JM. Bergua (42 (42) 0/42)  
 Cadiz, Hospital de Jerez, ads, peds, CIC 612, S. Garzon Lopez (no report)  
 Cadiz, Hospital Uni. Puerta del Mar, ads, CIC 679, A. Paz Coll (21 (21) 0/21)  
 Castellon de La Plana, Hospital General de Castellon, ads, CIC 844, R. Garcia-Boyer (20 (20) 0/20)  
 Cordoba, Hospital Reina Sofia, ads, peds, CIC 238, P. Gomez García, C. Martin (72 (80) 46/26)  
 Galdakao, Hospital de Galdakao, ads, CIC 975, J. Ojanguren, T. Carrascosa, K. Atutxa (17 (21) 0/17)  
 Girona, Institut Catala d'Oncologia, Josep Trueta, ads, CIC 433, D. Gallardo (23 (23) 0/23)  
 Granada, Hospital Virgen de la Nieves, ads, peds, CIC 559, M. Jurado Chacon (52 (57) 20/32)  
 Jaen, Hospital Ciudad de Jaen, ads, peds, F. Almagro Torres (12 (12) 0/12)  
 La Coruna, Complejo Hosp. Uni. A Coruna, ads, CIC 361, M-F. Lopez, C. Andon, P. Torres, R. Varela (55 (60) 17/38)  
 La Laguna, Tenerife, University Hospital Canary Isles, ads, peds, M.T. Hernandez-Garcia, B. Soris S. Barbara (17 (17) 0/17)  
 Las Palmas Canary Isles, Hospital Insular, ads, J. Gonzalez-San Miguel (10 (11) 0/10)  
 Las Palmas Canary Isles, Hospital Univ. de Gran Canaria 'Dr. Negrin', ads, CIC 537, T. Molero, S. Jiménez, A. Suarez, H. Luzardo (41 (46) 19/22)  
 Leon, Hospital Universitario de Leon, ads, CIC 426, F. Ramos, N de las Heras (14 (14) 0/14)  
 Lleida, Hospital Arnau de Vilanova, ads, A. Garcia Guinon (9 (9) 0/9)  
 Logrono, Hospital San Pedro, La Rioja, ads, CIC 917, P. Rabasa Baraibar (16 (18) 0/16)  
 Lugo, Hospital Lucus Augusti, ads, CIC 371, J. Arias Sampedro (9 (12) 0/9)



Madrid, Hospital Universitario San Carlos, ads, R. Martinez (20 (21) 0/20)  
 Madrid, Hospital Quiron, ads, JM. Fernandez-Ranada, A. Escudero (23 (24) 3/20)  
 Madrid, Clinica Moncloa, ads, A. Escudero, J. Fernandez-Ranada (10 (10) 0/10)  
 Madrid, Hospital Principe Asturias, Alcala de Henares, ads, JJ. Gil Fernandez, C. Burgaleta (5 (5) 0/5)  
 Madrid, Hospital Uni de Getafe, ads, L.Garcia Alonson, F.Oña Compan, N.Somolinos, C.Monteserin (7 (7) 0/7)  
 Madrid, Hospital Uni Sanchinarro, ads, J. Pérez de Oteyza (15 (15) 1/14)  
 Madrid, Hospital Severo Ochoa, Leganés, ads, P. Sanchez Godoy (8 (8) 0/8)  
 Madrid, Hospital de la Princesa, ads, CIC 236, A. Figuera, A. Alegre, R de la Camara (66 (74) 33/33)  
 Madrid, Fundacion Jimenez Diaz, ads, CIC 309, JL. Lopez-Lorenzo (31 (34) 8/23)  
 Madrid, Hospital Doce de Octubre, ads, CIC 382, J. de la Serna, J.J. Lahuerta (65 (65) 6/59)  
 Madrid, Hospital Universitario Materno Infantil Gregorio Maranon, peds, CIC 410, C. Belendez (8 (9) 7/1)  
 Madrid, Hospital Ramon y Cajal, ads, CIC 615, J. Lopez-Jiménez (84 (84) 40/44)  
 Madrid, Hospital Universitario Puerta de Hierro, ads, CIC 728, JR Cabrera Martin (31 (37) 17/14)  
 Madrid, Hospital Niño Jesus, peds, CIC 732, M.A. Diaz (30 (39) 22/8)  
 Madrid, Hospital Universitario Sanitas La Zarzuela, ads, CIC 779, R. De la Camara (4 (4) 0/4)  
 Madrid, Hospital General Universitario Gregorio Maranon, ads, peds, CIC 819, J.L. Diez-Martin, P. Balsalobre (55 (58) 34/21)  
 Madrid, Hospital La Paz, ads, peds, CIC 7341, R. De Paz, A. Martinez-Rubio (72 (74) 42/30)  
 Malaga, Carlos Haya Hospital, ads, peds, CIC 576, M-J. Pascual-Cason (111 (119) 52/59)  
 Murcia, Hospital Virgen de la Arrixaca, ads, peds, CIC 323, JM. Moraleda (54 (63) 23/31)  
 Murcia, Hospital General Universitario Morales Meseguer, ads, peds, CIC 735, V. Vicente-Garcia, I. Heras (53 (56) 23/30)  
 Orense, Com. Hospital Cristal-Pinor, ads, J-L. Sastre-Moral (12 (12) 0/12)  
 Oviedo, Hospital Covadonga, Central Asturias, ads, peds, CIC 642, S. Gonzalez-Muniz (90 (91) 22/68)  
 Palma de Mallorca, Hospital son Llatzer, ads, CIC 110, J. Bargay-Lleonart (21 (22) 0/21)  
 Palma de Mallorca, Hospital Uni. Son Espases (Son Dureta), ads, peds, CIC 722, A. Sampol (35 (39) 9/26)  
 Pamplona, Hospital de Navarra, ads, CIC 577, T. Zudaire, M. Rodriguez (34 (36) 10/24)  
 Pamplona, Clinica Universitaria de Navarra, ads, peds, CIC 737, J. Rifon (18 (20) 7/11)  
 Pontevedra, Hospital Montecelo, ads, peds, A-M. Dios Loureiro (9 (9) 0/9)  
 Salamanca, Complejo Hospital, ads, peds, CIC 727, D. Caballero (133 (143) 69/64)  
 San Sebastian, Hospital Universitario Donostia, ads, peds, CIC 598, C. Vallejo Llamas, JJ Ferreiro Martinez (77 (85) 47/30)  
 Santander, Hospital Universitario M. de Valdecilla, ads, peds, CIC 242, C. Richard Espiga, E. Conde (58 (58) 34/24)  
 Santiago de Compostela, Hospital Clinico Universitario, ads, peds, CIC 570, J.L. Bello Lopez (46 (50) 26/20)  
 Sevilla, Hospital Universitario Virgen del Rocio, ads, peds, CIC 769, I. Espigado, F. Marquez (130 (131) 64/66)  
 Tarragona, Hospital Joan XXIII, ads, C. Talarn Forcadell (15 (15) 0/15)  
 Tenerife Canary Isles, Hospital N. S. De la Candelaria, ads, J. Garcia-Talavera, J. Breña, P. Rios Rull (19 (21) 0/19)  
 Valencia, Instituto Valenciano de Oncologia, ads, A. Avaria, C. Salazar (6 (7) 0/6)  
 Valencia, Hospital Arnau de Vilanova de Valencia, ads, A. Lopez Martinez (9 (9) 0/9)  
 Valencia, Hospital Doctor Peset, ads, P. Ribas-Garcia (22 (22) 0/22)  
 Valencia, Hospital Clinico Universitario, ads, CIC 282, C. Solano (69 (74) 30/39)  
 Valencia, Hospital Universitario La Fe, peds, CIC 653, J.M. Fernandez Navarro (15 (18) 8/7)  
 Valencia, Hospital Universitario La Fe, ads, peds, CIC 663, M.A. Sanz, G.F.Sanz (111 (114) 67/44)  
 Valladolid, Hospital Rio Hortega, ads, CIC 611, J. Garcia Frade (32 (36) 4/28)  
 Vigo, Hospital Xeral-Cies, ads, CIC 421, C. Albo Lopez (33 (44) 14/19)  
 Zaragoza, Hospital Miguel Servet, ads, P. Delgado (34 (35) 8/26)  
 Zaragoza, Clin. Universitario Lozano Blesa, ads, CIC 531, L. Palomera Bernal (16 (16) 0/16)

**Sweden:** (7 teams: 720 (784) 249/471)  
 Goteborg, CHECT Sahlgrenska University Hospital, ads, peds, CIC 289, J. Johansson, K. Mellgren (128 (132) 45/83)  
 Linköping, University Hospital, ads, CIC 740, A. Sandstedt (70 (77) 22/48)  
 Lund, University Hospital, ads, peds, CIC 283, S. Lenhoff (119 (136) 42/77)  
 Örebro, Medical Center Hospital, ads, CIC 738, P. Kozlowski (25 (33) 0/25)

Stockholm, Karolinska University Hospital, ads, peds, CIC 212, P. Ljungman, O. Ringden (203 (215) 77/126)

Umea, Umea University Hospital, ads, CIC 731, A. Wahlin, V. Lazarevic, J. Lindh, B. Markevärn (54 (58) 23/31)

Uppsala, University Hospital, ads, peds, CIC 266, K. Carlson (121 (133) 40/81)

**Switzerland:** (10 teams: 605 (715) 221/384)

Aarau, Kantonsspital Aarau, ads, CIC 316, M. Wernli, M. Bargetzi (37 (50) 0/37)

Basel, Universitätsspital Basel, ads, peds, CIC 202, J. Passweg (115 (133) 85/30)

Bellinzona, Ospedale San Giovanni, ads, CIC 829, L. Wannesson, L. Leoncini (15 (19) 0/15)

Bern, Inselspital, ads, peds, CIC 221, K. Leibundgut, T. Pabst, G. Baerlocher (119 (145) 0/119)

Geneva, Hôpital Cantonal Universitaire, ads, peds, CIC 261, Y. Chalandon, M. Ansari (57 (68) 57/0)

Lausanne, CHUV, ads, CIC 820, M. Duchosal, A. Rosselet (66 (77) 0/66)

St. Gallen, Kantonsspital, ads, CIC 324, U. Hess (25 (28) 0/25)

Zurich, University Hospital, ads, peds, CIC 208, U. Schanz, P. Samaras (133 (150) 58/75)

Zurich, Universitäts Kinderklinik, peds, CIC 334, T. Güngör, F. Scherer (25 (31) 21/4)

Zurich, Hospital Hirslanden, ads, CIC 638, Ch. Renner (13 (14) 0/13)

**Tunisia:** (1 team: 85 (89) 37/48)

Tunis, National BMT Centre, ads, peds, CIC 183, B. Othman Tarck (85 (89) 37/48)

**Turkey:** (41 teams: 2'470 (2'661) 1'252/1'218)

Adana, Cukurova University Hospital, ads, B. Sahin (no report)

Adana, Adana Acibadem Hospital, peds, CIC 454, A. Antmen (34 (39) 33/1)

Adana, Baskent University Adana, ads, CIC 589, H. Ozdogu, C. Boga, S. Asma (61 (66) 26/35)

Adana, Cukurova University Pediatric BMT Centre, Balcali, peds, I. Bayram, S. Küpeli, G. Sezgin (22 (23) 19/3)

Ankara, University Faculty of Medicine, Cebeci, ads, A. Demirkazik (2 (2) 0/2)

Ankara, GATA BMT Center, Etlik, ads, peds, M. Ozturk (no report)

Ankara, Childrens Hospital, peds, N. Özbek (no report)

Ankara, Ankara Research and Education Hospital, ads, F. Altuntas, M. Yüksel (no report)

Ankara, Hacettepe University Medical School, Sıhhiye, ads, CIC 168, H. Goker (44 (45) 17/27)\*

Ankara, Gazi University, Besevler, ads, CIC 169, Z. A. Yegin, Z.N. Ozkurt (53 (62) 28/25)

Ankara, Gazi University Medical School, Besevler, peds, CIC 182, U. Kocak (13 (13) 11/2)

Ankara, Ihsan Dogramaci Childrens Hospital (Hacettepe), peds, CIC 399, D. Uckan-Cetinkaya, B. Kuskonmaz (27 (27) 25/2)

Ankara, Ankara Bayinder Hospital, ads, CIC 412, A. Ural (23 (31) 14/9)

Ankara, Ankara University Faculty of Medicine, Dikimevi, ads, CIC 617, G. Gürmann (95 (107) 46/49)

Ankara, University of Ankara, Cebeci, peds, CIC 620, E. Unal, M. Ertem (47 (50) 40/7)

Ankara, Numune Education and Research Hospital, ads, CIC 691, G. Özet (37 (43) 8/29)

Ankara, Private Medicana International Hospital, ads, CIC 862, E. Soydan (178 (178) 93/85)

Antalya, Akdeniz University Medical School, peds, CIC 618, A. Kupesi (43 (45) 38/5)

Antalya, Akdeniz University School of Medicine, ads, CIC 685, L. Undar (34 (37) 4/30)

Antalya, Medstar Antalya Hospital, Cakirlar, ads, CIC 864, I. Karadogan (48 (61) 16/32)

Antalya, Medical Park Antalya Hospital, Lara, peds, CIC 911, A. Yesilipek (91 (103) 90/1)

Antalya, Medical Park Hospitals, ads, CIC 919, Y. Koc (62 (79) 35/27)

Atakum, Samsun Medicalpark Hospital, peds, CIC 881, H. Emel Ozyurek, M. Elli, E. Sahin (18 (18) 15/3)

Aydin, Adnan Menderes University Medical Faculty, ads, CIC 187, I. Yavasoglu, Z. Bolaman (21 (21) 7/14)

Bursa, Uludag University School of Medicine, ads, V. Özkocaman (40 (40) 8/32)

Denizli, Pamukkale University Hospital, ads, I. Sari (no report)

Diyarbakir, Dicle University Faculty, ads, O. Ayyildiz (no report)

Erzurum, Atatürk University, ads, Y. Bilen (no report)

Eskisehir, Osmangazi University, ads, CIC 686, E. Gündüz (no report)

Gaziantep, Gaziantep University Medical School, ads, peds, CIC 402, M. Pehlivan (70 (73) 22/48)

Istanbul, Bahcelievler Medical Park Hospital, ads, S. Zeynep Aki, G. Sucak (78 (84) 35/43)

Istanbul, Acidadem Atakent Hospital, ads, S. Karti (90 (90) 15/75)

Istanbul, Acibadem Kozyatagi Hospital, ads, S. Ratip (45 (45) 18/27)

Istanbul, Istanbul Medipol University, ads, CIC 445, D. Sargin (67 (69) 27/40)\*

Istanbul, Istanbul Medipol University, peds, CIC 446, S. Anal (39 (41) 27/12)\*

Istanbul, Medical Park Bahcelievier, peds, CIC 448, H. Toksoy (no report)  
 Istanbul, Acibadem University Atakent Hospital, peds, CIC 457, G. Öztürk, F. Erbey (70 (74) 70/0)  
 Istanbul, Yeniyuzyl University, Gaziosmanpasa Hospital, peds, CIC 459, M. Gokce (no report)  
 Istanbul, University of Istanbul, ads, CIC 760, M. Aktan (42 (44) 20/22)  
 Istanbul, Cerrahpasa Medical Faculty, ads, CIC 761, T. Soysal, M. Cem Ar (57 (59) 21/36)\*  
 Istanbul, Medical Park Goztepe Hospital, peds, CIC 929, G. Karasu, SC. Kilic (91 (100) 89/2)\*\*  
 Istanbul, Florence Nightingale Sisli Hospital, ads, peds, CIC 994, M. Arat (142 (143) 65/77)  
 Izmir, Izmir, Tepecik Research and Educational Hospital, peds, H. Öniz (3 (3) 2/1)  
 Izmir, Ege University Medical Faculty, Bornova, peds, CIC 621, S. Kansoy (53 (58) 47/6)  
 Izmir, Ege University Medical School, Bornova, ads, CIC 628, F. Vural, G. Saydam, N. Soyer (83 (83) 28/55)\*  
 Izmir, Dokuz Eylul University, ads, peds, CIC 688, G. H. Özsan. H. Ören (40 (41) 9/31)  
 Izmir, Medicalpark Private Hospital, Karsiyaka, ads, S. Cagirgan, S. Ocakci, S. Kahraman, C. Acariar (117 (124) 46/71)  
 Kayseri, Erciyes University Hospital, ads, CIC 627, A. Unal, M. Cetin (104 (128) 50/54)  
 Kayseri, Erciyes University Faculty of Medicine, peds, CIC 913, M. Karakukcu (41 (45) 33/8)  
 Kocaeli, Anadolu Medical Center Hospital, ads, peds, CIC 440, Z. Gülbaz (234 (265) 105/129)  
 Konya, Selcuk Faculty of Medicine Meram Konya, ads, A. Ügur Bilgin (no report)  
 Malatya, Inonu University Targut Özal Medical Centre, ads, CIC 437, M. Ali Erkurt, E. Kaya (67 (67) 27/40)  
 Trabzon, Karadeniz Technical University, ads, CIC 170, M. Sonmez (35 (35) 12/23)  
 Umraniye-Istanbul, Hisar Intercontinental Hospital, ads, C. Aksoy (no report)

**Ukraine:** (2 teams: 81 (91) 16/65)

Kiev, Kiev Regional Oncologic Hospital, peds, S. Donska, O. Ryzhak (24 (27) 16/8)  
 Kiev, Kiev City BMT Center, ads, peds, E. Karamanesht, V. Khomenko, I. Korenkova (57 (64) 0/57)

**United Kingdom:** (52 teams: 3'666 (4'049) 1'521/2'145 )

Aberdeen, The Royal Infirmary, ads, CIC 344, D.J.Culligan (12 (14) 0/12)  
 Bangor, Ysbyty Gwynedd, ads, CIC 736, D. Edwards (7 (7) 0/7)  
 Bath, Royal United Hospital, ads, CIC 619, C. Knechtli (20 (21) 0/20)  
 Belfast, Belfast City Hospital Trust, ads, peds, CIC 268, D. Finnegan (72 (73) 11/61)  
 Birmingham, Heartlands Hospital, ads, CIC 284, E. Nikolousis, S. Paneesha (62 (67) 31/31)  
 Birmingham, Queen Elizabeth Hospital, ads, peds, CIC 387, C. Craddock, P. Mahendra (179 (196) 89/90)  
 Birmingham, The Birmingham Children's Hospital, peds, CIC 781, S. Lawson (36 (46) 30/6)  
 Blackpool, Victoria Hospital, ads, CIC 832, M.P. Macheta (35 (38) 0/35)  
 Bournemouth, Royal Bournemouth Hospital, ads, CIC 765, R. Hall (13 (13) 0/13)  
 Bristol, Avon and Royal Hospital for Sick Children, ads, peds, CIC 386, S. Robinson, D. Marks, C. Steward. R. Protheroe (110 (114) 74/36)  
 Cambridge, Addenbrooke's Hospital, ads, CIC 566, C.Crawley, J Craig, A. Sureda, (111 (121) 56/55)  
 Cardiff/Swansea, University Hospital of Wales, ads, peds, CIC 303, K.M.O. Wilson, W. Ingram, P. Connor, S. Al Ismail (130 (142) 53/77)  
 Cheltenham, Cheltenham General Hospital, ads, CIC 398, S. Chown (22 (23) 0/22)  
 Coventry, University Hospital & Warwickshire NHS Trust, ads, F. Jones, B. Warrison (26 (30) 0/26)  
 Dudley, Dudley NHS Trust, ads, CIC 405, S. Fernandes (9 (10) 0/9)  
 Dundee, Ninewells Hospital, ads, CIC 719, D. Meiklejohn (13 (13) 0/13)  
 Edinburgh, The Western General Hospital, ads, CIC 228, A. J.M. Broom, F.Scott, P.Roddie (46 (49) 1/45)  
 Exeter, Royal Devon and Exeter Hospital, ads, CIC 571, J. Ruell (13 (15) 0/13)  
 Glasgow, Beatson, West of Scotland Cancer Centre, ads, CIC 244, I.G. McQuaker, A. Parker, T. Fitzsimons (154 (156) 57/97)  
 Glasgow, Royal Hospital for Sick Children, peds, CIC 707, B. Gibson (18 (24) 13/5)  
 Ipswich, Ipswich Hospital, ads, CIC 128, A. Hodson, JA. Ademokun (12 (12) 0/12)  
 Leeds, Leeds Teaching Hospitals Trust, ads, peds, CIC 254, M. Gilleece, B. James (112 (114) 68/44)  
 Leicester, Royal Infirmary Hospital, ads, CIC 713, A.E. Hunter (70 (73) 29/41)  
 Liverpool, Royal Liverpool University Hospital, ads, peds, CIC 501, I. Hart, R. Salim (93 (102) 31/62)  
 Liverpool, Alder Hay, peds, CIC 773, M. Caswell (8 (17) 0/8)  
 London, Hammersmith Hospitals NHS Trust, ads, CIC 205,  
 J.Apperley, E.Olavarria, E.Kanfer, A.Rahemtulla, R. Szydlo (112 (131) 49/63)



London, Royal Marsden Hospital, ads, peds, CIC 218, M. Potter (182 (224) 64/118)  
 London, University College Hospital, ads, peds, CIC 224, K. Thomson (298 (320) 111/187)  
 London, Great Ormond Street Hospital, peds, CIC 243, P. Veys (91 (98) 59/32)  
 London, The London Clinic, ads, CIC 263, M. Potter (21 (23) 8/13)  
 London, Parkside Hospital, ads, CIC 450, R. Powles (5 (6) 0/5)  
 London, London Bridge Hospital, ads, CIC 460, M. Kazmi (4 (4) 0/4)  
 London, St. George's Hospital, ads, CIC 539, M. Koh, M. Klammer, E. Gordon-Smith (31 (31) 10/21)  
 London, King's College Hospital, ads, CIC 763, G. Mufti, A. Pagliuca (204 (212) 92/112)  
 London, St. Bartholomew's and the Royal London Hospital, ads, CIC 768, J. Gribben, J. Cavenagh, S. Agrawal, T. Lister (120 (138) 46/74)  
 London, St Mary's Hospital, peds, CIC 866, J de La Fuente (31 (32) 30/1)  
 Manchester, Royal Children's Hospital, peds, CIC 521, R. Wynn (44 (52) 38/6)  
 Manchester, The Royal Infirmary, ads, CIC 601, E. Tholouli (128 (143) 67/61)  
 Manchester, Christie Hospital, ads, CIC 780, A.Bloor (99 (117) 36/63)  
 Newcastle upon Tyne, Freeman Hospital, ads, peds, CIC 276, M. Collins, M. Slatter (181 (201) 110/71)  
 Norwich, Norfolk+Norwich Hosp., ads, CIC 391, M. Lawes, J. Wimperis, G. Turner (21 (24) 0/21)  
 Nottingham, Nottingham City Hospital, ads, CIC 717, N. Russell, J.L. Byrne, A.P. Haynes, A.McMillan (163 (176) 67/96)  
 Oxford, Churchill, Stoke Manderville Hospitals, ads, CIC 255, R.Aitchison,A. Peniket,T.Littlewood,V.Rocha,C.Hatton,G.Collins (117 (127) 45/72)  
 Oxford, John Radcliffe Children's Hospital, peds, CIC 603, G. Hall (8 (11) 0/8)  
 Plymouth, Derriford Hospital, ads, peds, CIC 823, H.M.Hunter (61 (65) 22/39)  
 Poole, Poole Hospital NHS Foundation Trust, ads, CIC 458, J. Fergus (19 (19) 0/19)  
 Sheffield, Teaching Hospitals NHS Trust , Children's Hospital, ads, CIC 778, J.Snowden, A.Vora (112 (131) 40/72)  
 Sheffield, Childrens NHS Foundation, peds, CIC 933, A. Vora (19 (30) 13/6)  
 Southampton, CRC Wessex, ads, peds, CIC 704, A.Duncombe, D. Richardson (163 (187) 71/92)  
 Stoke-on-Trent, University Hospital of North Staffordshire, peds, CIC 394, R. Chasty (23 (27) 0/23)  
 Swindon, Great Western Hospital, ads, CIC 608, N. E. Blesing (14 (16) 0/14)  
 Taunton, Taunton and Somerset Hospital, ads, S. Bolam (12 (14) 0/12)

\* EBMT Registry data

\*\* Late report – Appendix only

Total Europe: 655 teams: 37'626 (42'171) 16'030/21'596)
